# Supplementary material for: Short-term effects of high-protein, lower-carbohydrate ultra-processed foods on human energy balance
Source: Springer Nature journal article supplement (doi:10.1038/s42255-025-01247-4), 2025-03-13
Supplement: MOESM1 [file 42255_2025_1247_MOESM1_ESM.pdf]

# **Short-term effects of high-protein, lower-carbohydrate ultra-processed foods on human energy balance**

---

In the format provided by the  
authors and unedited

## Content

|                                                                                                                            |   |
|----------------------------------------------------------------------------------------------------------------------------|---|
| <b>Supplementary Figure 1:</b> Meals provided to the subjects on days 4 and 5 .....                                        | 4 |
| <b>Supplementary Figure 2:</b> Exemplary meals provided to the subjects during run-in period .....                         | 5 |
| <b>Supplementary Table 1:</b> CONSORT checklist of information to include when reporting randomised crossover trials ..... | 6 |

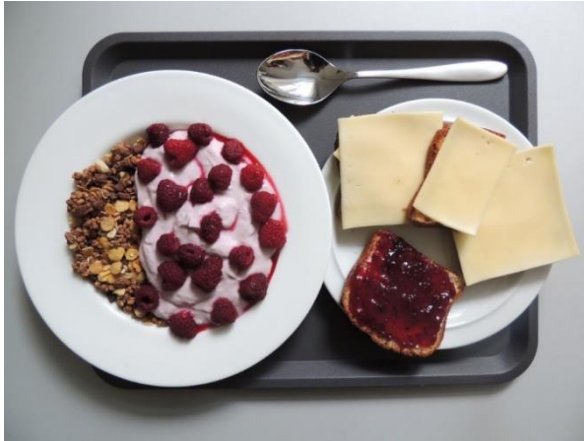

#### **Breakfast day 4 HPLC**

*high protein* cereals (Dr. Oetker), *high protein* raspberry-pomegranate yoghurt (Ehrmann) with raspberries, *protein* toast (BenFit), butter, cheese, jam

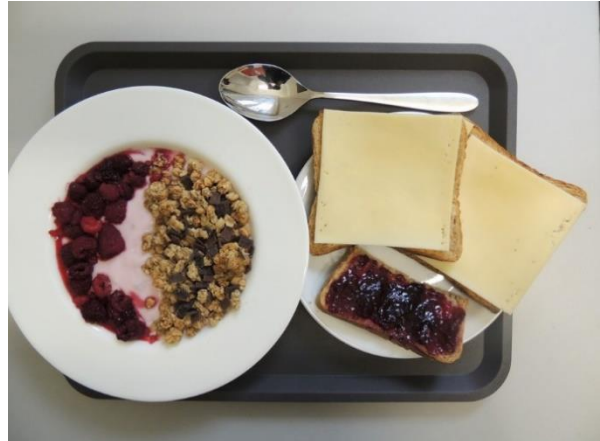

#### **Breakfast day 4 NPNC**

cereals (Dr. Oetker), raspberry yoghurt (Ehrmann), with raspberries, toast (Harry Brot), butter, cheese, jam

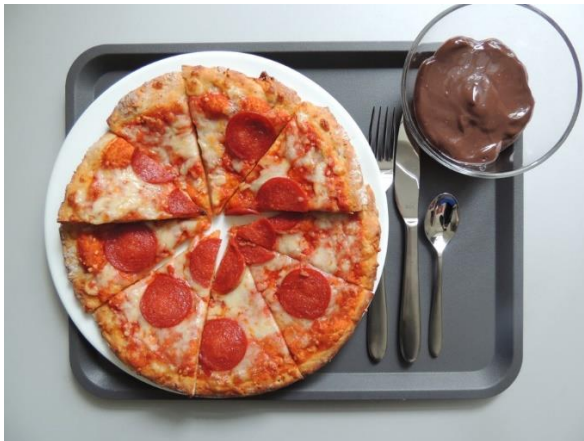

#### **Lunch day 4 HPLC**

*high protein* Salami pizza (Prozis), *high protein* chocolate pudding (Ehrmann)

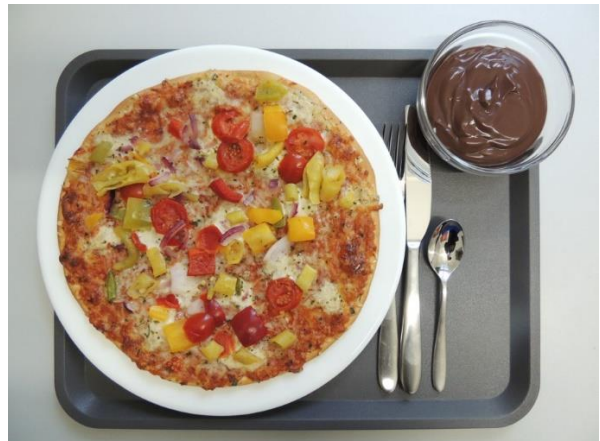

#### **Lunch day 4 NPNC**

vegetable pizza (Dr. Oetker), plant-based chocolate pudding (Dr. Oetker)

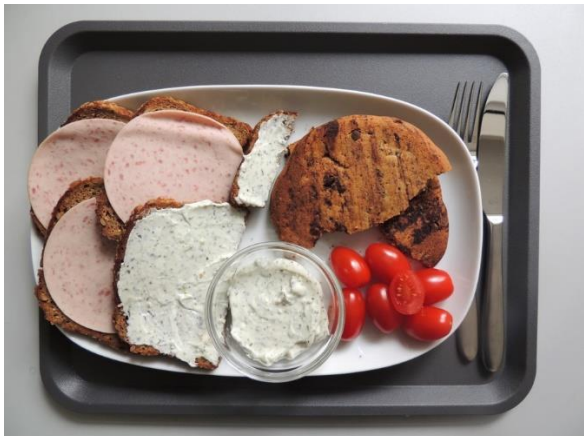

#### **Dinner day 4 HPLC**

*protein* bread (Harry Brot), cream cheese (Mondelez), ham sausage (Rügenwalder Mühle), tomatoes, *protein* chocolate chip cookie (Foodspring)

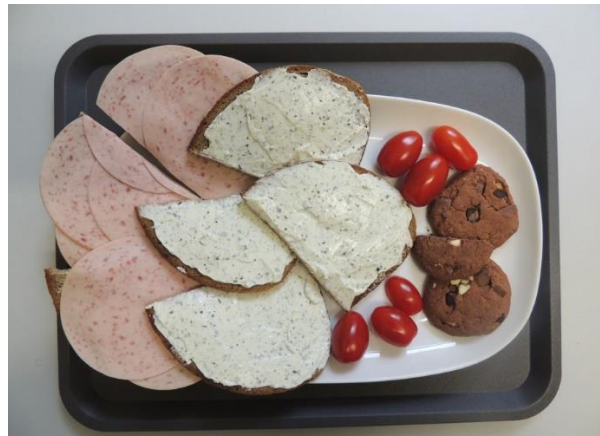

#### **Dinner day 4 NPNC**

bread (Harry Brot), cream cheese (Mondelez), ham sausage (Rügenwalder Mühle), tomatoes, chocolate chip cookie (Rewe Beste Wahl)

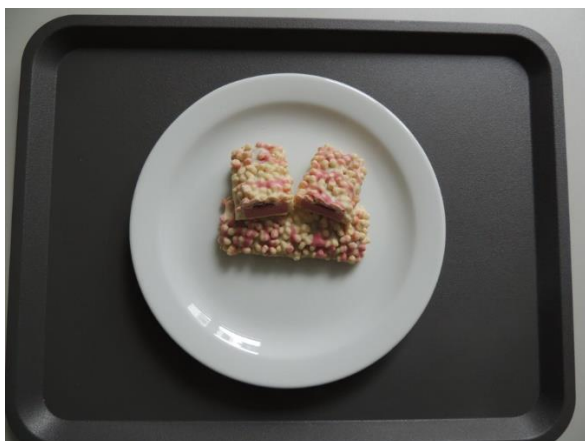

#### **Snack day 4 HPLC**

*protein bar raspberry crisp (dm Sportness)*

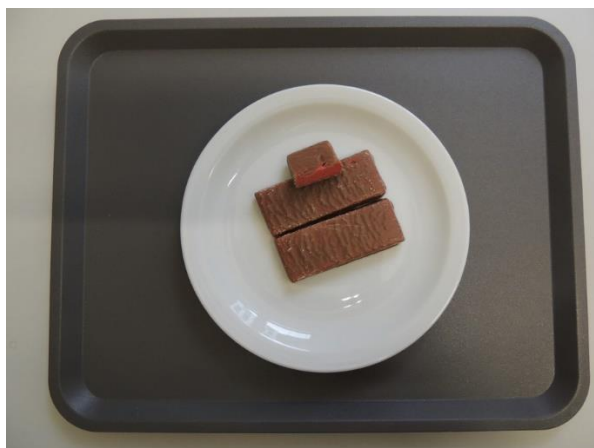

#### **Snack day 4 NPNC**

*energy bar raspberry yoghurt (dm Sportness)*

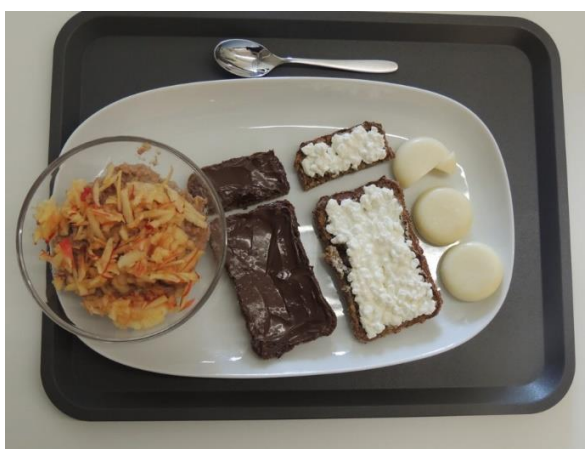

#### **Breakfast day 5 HPLC**

*protein chocolate porridge (Seitenbacher) with milk (3.5 % fat) and apple, protein toast buns (Mestemacher), cream cheese with herbs (Mondelez), high protein cheese (Mini Babybel), protein hazelnut spread (Foodspring)*

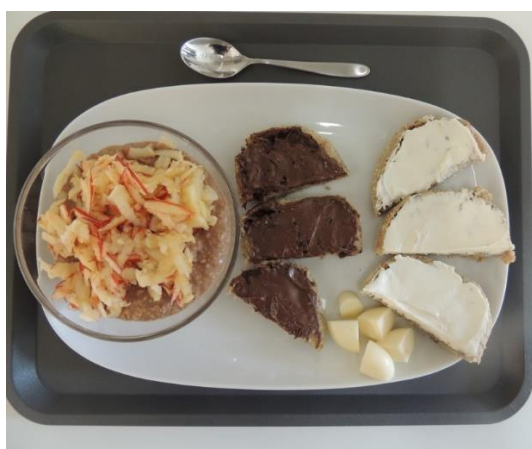

#### **Breakfast day 5 NPNC**

*chocolate porridge (Kölln) with milk (1.5 % fat), water and apple, seeded toast buns (Harry Brot), cream cheese (Mondelez), cheese (Mini Babybel), hazelnut spread (Ferrero)*

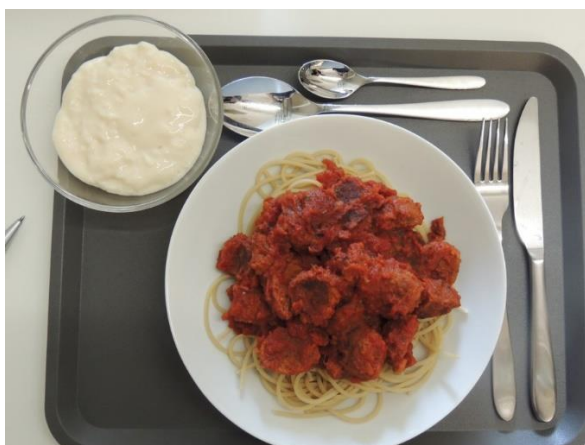

#### **Lunch day 5 HPLC**

*protein spaghetti (Prozis) with tomato sauce (Barilla) and vegetarian dumplings (Garden Gourmet, Nestlé), high protein rice pudding (Müller Milch) and red fruit jelly (Zum Dorfkrug)*

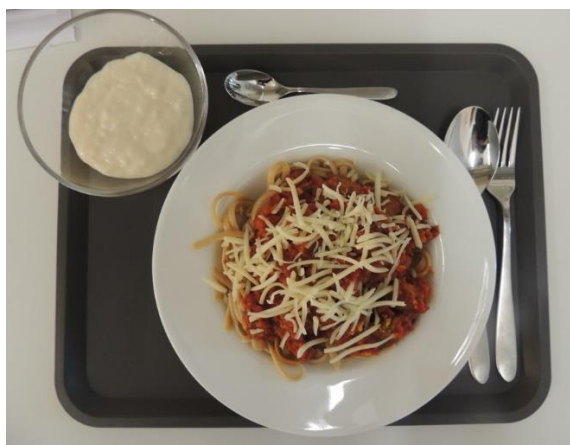

#### **Lunch day 5 NPNC**

*whole grain spaghetti (Barilla) with tomato sauce (Barilla), cheese (Milram) and vegan falafel (Garden Gourmet, Nestlé), rice pudding (Müller Milch) and red fruit jelly (Zum Dorfkrug)*



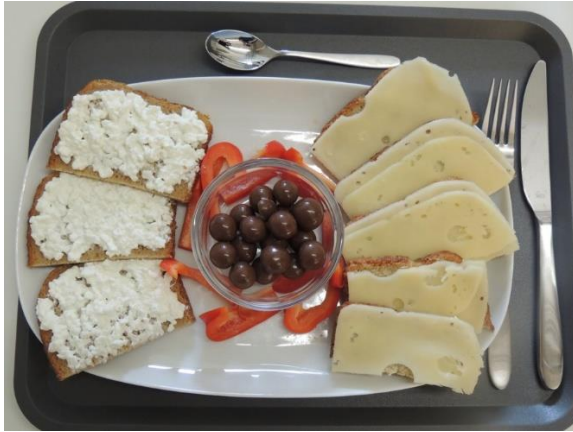

#### **Dinner day 5 HPLC**

*high protein bread (Mestemacher), butter, cheese (Gr nlander), cream cheese (Mondelez), bell pepper, high protein crispy balls (Ehrmann)*

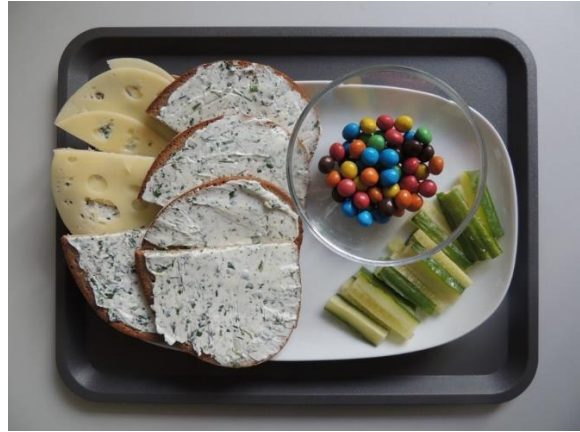

#### **Dinner day 5 NPNC**

*bread (Harry Brot), cheese (Gr nlander), cream cheese (Mondelez), herbs, cucumber, M&M's crispy (Mars)*

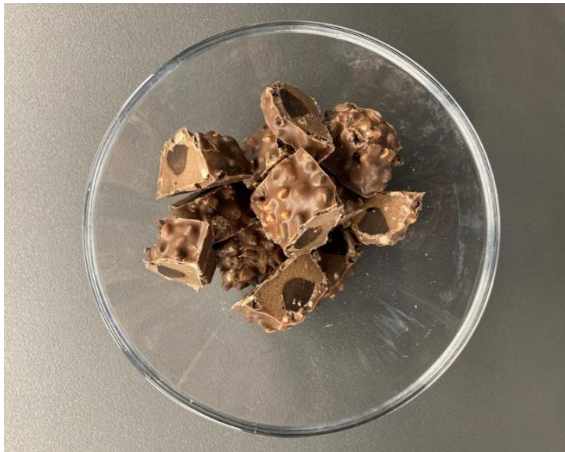

#### **snack day 5 HPLC**

*protein bar hazelnut nougat crisp (dm Sportness)*

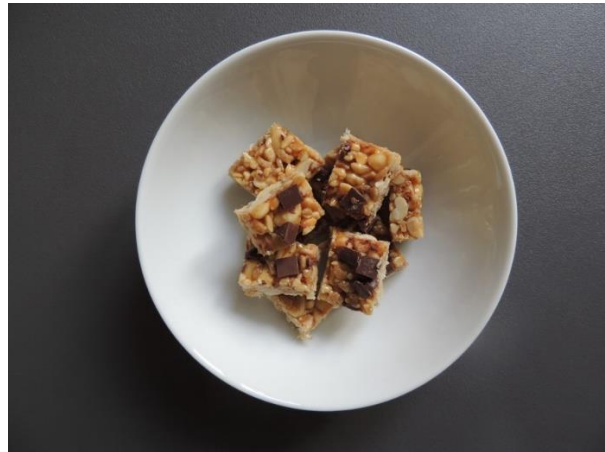

#### **snack day 5 NPNC**

*nut bar (Corny)*

### **Supplementary Figure 1: Meals provided to the subjects on days 4 and 5**

During intervention days within the whole-room indirect calorimeter (WRIC), an ultra-processed diet (>80 % ultra-processed food) was presented to the subjects. A high protein-lower carbohydrate diet (HPLC, 30 % protein, 29 % carbohydrates, CHO) and a normal protein-normal CHO diet (NPNC, 13 % protein, 46 % CHO) were received in randomized order. Subjects were blinded to the protein content of the diet. Breakfast (08:30), lunch (13:30), dinner (18:30) and an optional evening snack (20:00-21:15) were provided. The photographs of the daily menus described above show exemplary meals. The actual amount of food presented to the subjects depended on individual energy requirements as described in the methods section in the chapter "diet composition" of the main text.

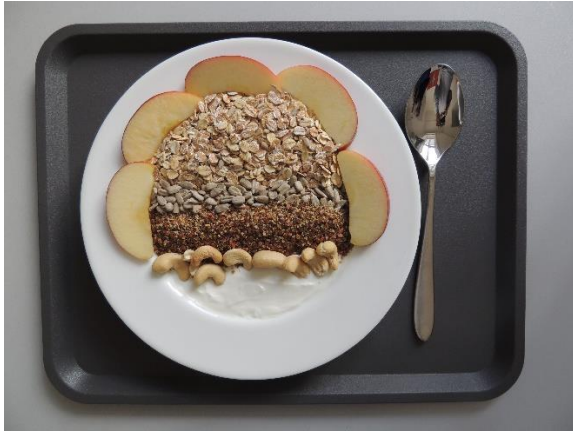

#### **Breakfast HPLC**

whole grain cereals with sunflower seeds, cashews and flaxseed, skyr (Arla) and apple

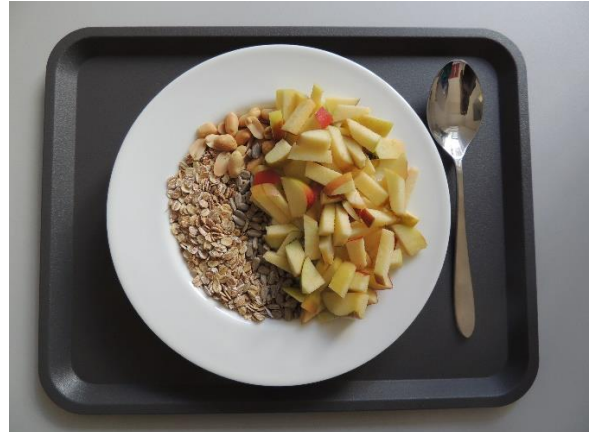

#### **Breakfast NPNC**

whole grain cereals with sunflower seeds, yoghurt and Greek yoghurt, apple

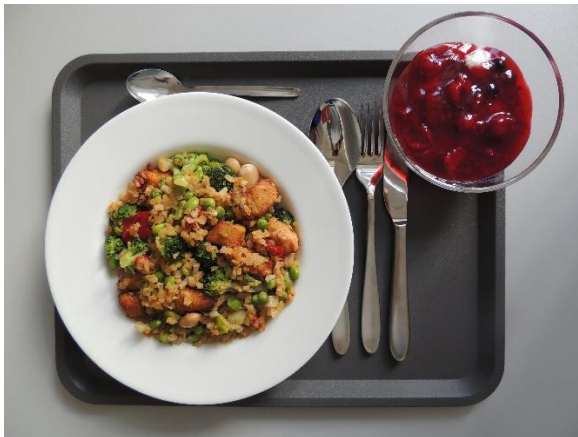

#### **Lunch HPLC**

high protein vegetable lentil curry (Frosta) with edamame (peeled) and red fruit jelly (Zum Dorfkrug)

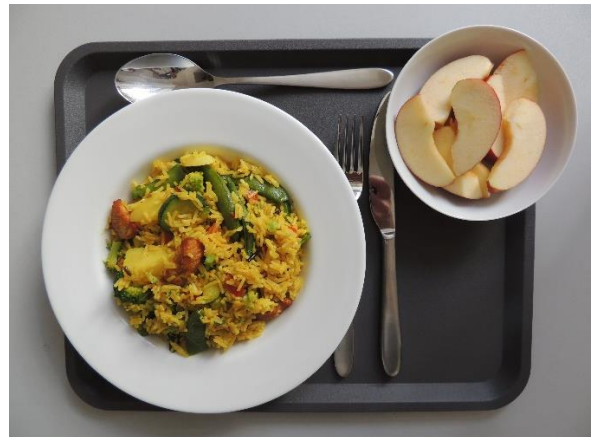

#### **Lunch NPNC**

chicken curry with rice and vegetables (Frosta), broccoli, apple

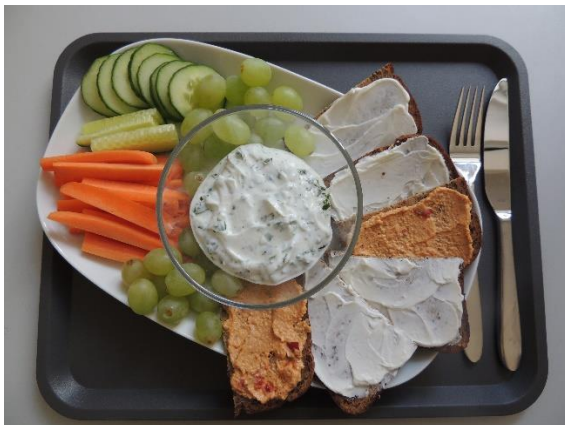

#### **Dinner HPLC**

protein bread (dm), cream cheese (Mondelez), hummus (Noa), grapes, cucumber, carrot, curd and Greek yoghurt with herbs

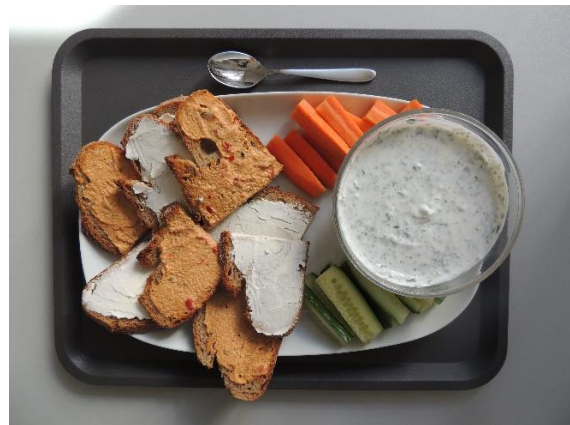

#### **Dinner NPNC**

bread (Harry Brot), cream cheese (Mondelez), Mediterranean vegetable spread, cucumber, carrot, curd and Greek yoghurt with herbs

### **Supplementary Figure 2: Exemplary meals provided to the subjects during run-in period**

During the run-in period with controlled nutrition at home, a diet with <45 % ultra-processed food was presented to the subjects. A high protein-lower carbohydrate diet (HPLC, 30 % protein, 29 %

carbohydrates, CHO) and a normal protein-normal CHO diet (NPNC, 13 % protein, 46 % CHO) were received in randomized order. Subjects were blinded to the protein content of the diet. Breakfast, lunch and dinner were provided to eat at home, no other foods or caloric drinks were allowed. The photographs of the daily menus described above show exemplary meals. The actual amount of food presented to the subjects depended on individual energy requirements as described in the methods section in the chapter “diet composition” of the main text.

**Supplementary Table 1: CONSORT checklist of information to include when reporting randomised crossover trials**

| Section/topic                             | Item No | Description                                                                                                                                                                                                        | Page No*  |
|-------------------------------------------|---------|--------------------------------------------------------------------------------------------------------------------------------------------------------------------------------------------------------------------|-----------|
| Title†                                    | 1a      | Identification as a randomised crossover trial in the title                                                                                                                                                        | -         |
| Abstract†                                 | 1b      | Specify a crossover design and report all information outlined in Table 2 of Dwan et al, <i>BMJ</i> 2019;366:l4378; doi: 10.1136/bmj.l4378                                                                         | 2         |
| <b>Introduction:</b>                      |         |                                                                                                                                                                                                                    |           |
| Background‡                               | 2a      | Scientific background and explanation of rationale                                                                                                                                                                 | 3-4       |
| Objectives‡                               | 2b      | Specific objectives or hypotheses                                                                                                                                                                                  | 3-4       |
| <b>Methods:</b>                           |         |                                                                                                                                                                                                                    |           |
| Trial design†                             | 3a      | Rationale for a crossover design. Description of the design features including allocation ratio, especially the number and duration of periods, duration of washout period, and consideration of carry over effect | 18-19     |
| Change from protocol‡                     | 3b      | Important changes to methods after trial commencement (such as eligibility criteria), with reasons                                                                                                                 | na        |
| Participants‡                             | 4a      | Eligibility criteria for participants                                                                                                                                                                              | 17-18     |
| Settings and location‡                    | 4b      | Settings and locations where the data were collected                                                                                                                                                               | 17        |
| Interventions†                            | 5       | The interventions with sufficient details to allow replication, including how and when they were actually administered                                                                                             | 18-22     |
| Outcomes‡                                 | 6a      | Completely defined prespecified primary and secondary outcome measures, including how and when they were assessed                                                                                                  | 27, 20-27 |
| Changes to outcomes‡                      | 6b      | Any changes to trial outcomes after the trial commenced, with reasons                                                                                                                                              | na        |
| Sample size†                              | 7a      | How sample size was determined, accounting for within participant variability                                                                                                                                      | 27        |
| Interim analyses and stopping guidelines‡ | 7b      | When applicable, explanation of any interim analyses and stopping guidelines                                                                                                                                       | na        |
| <b>Randomisation:</b>                     |         |                                                                                                                                                                                                                    |           |
| Sequence generation‡                      | 8a      | Method used to generate the random allocation sequence                                                                                                                                                             | 18        |
| Sequence generation‡                      | 8b      | Type of randomisation; details of any restriction (such as blocking and block size)                                                                                                                                | 18        |
| Allocation concealment‡                   | 9       | Mechanism used to implement the random allocation sequence§ (such as sequentially numbered mechanism containers),                                                                                                  | 18-19     |



|                                              |     |                                                                                                                                                                                                                                                                   |                   |
|----------------------------------------------|-----|-------------------------------------------------------------------------------------------------------------------------------------------------------------------------------------------------------------------------------------------------------------------|-------------------|
|                                              |     | describing any steps taken to conceal the sequence until interventions were assigned                                                                                                                                                                              |                   |
| Implementation†                              | 10  | Who generated the random allocation sequence,§ who enrolled participants, and who assigned participants to the sequence of interventions                                                                                                                          | 18                |
| Blinding‡                                    | 11a | If done, who was blinded after assignment to interventions (for example, participants, care providers, those assessing outcomes) and how                                                                                                                          | 19                |
| Similarity of interventions‡                 | 11b | If relevant, description of the similarity of interventions                                                                                                                                                                                                       | na                |
| Statistical methods†                         | 12a | Statistical methods used to compare groups for primary and secondary outcomes which are appropriate for crossover design (that is, based on within participant comparison)                                                                                        | 27                |
| Additional analyses‡                         | 12b | Methods for additional analyses, such as subgroup analyses and adjusted analyses                                                                                                                                                                                  | na                |
| <b>Results</b>                               |     |                                                                                                                                                                                                                                                                   |                   |
| Participant flow (a diagram is recommended)† | 13a | The numbers of participants who were randomly assigned, received intended treatment, and were analysed strongly for the primary outcome, separately for each sequence and period                                                                                  | Ext. Data Fig. 1  |
| Losses and exclusions†                       | 13b | No of participants excluded at each stage, with reasons, separately for each sequence and period                                                                                                                                                                  | Ext. Data Fig. 1  |
| Recruitment‡                                 | 14a | Dates defining the periods of recruitment and follow-up                                                                                                                                                                                                           | 17                |
| Trial end‡                                   | 14b | Why the trial ended or was stopped                                                                                                                                                                                                                                | na                |
| Baseline data†                               | 15  | A table showing baseline demographic and clinical characteristics by sequence and period                                                                                                                                                                          | Ext. Data Table 1 |
| Numbers analysed†                            | 16  | Number of participants (denominator) included in each analysis and whether the analysis was by original assigned groups                                                                                                                                           | Ext. Data Fig. 1  |
| Outcomes and estimation†                     | 17a | For each primary and secondary outcome, results including estimated effect size and its precision (such as 95% confidence interval) should be based on within participant comparisons.¶ In addition, results for each intervention in each period are recommended | 4-11              |
| Binary outcomes‡                             | 17b | For binary outcomes, presentation of both absolute and relative effect sizes is recommended                                                                                                                                                                       | na                |
| Ancillary analyses‡                          | 18  | Results of any other analyses performed, including subgroup analyses and adjusted analyses, distinguishing prespecified from exploratory                                                                                                                          | na                |
| Harms†                                       | 19  | Describe all important harms or untended effects in a way that accounts for the design (for specific guidance, see CONSORT for harms⁹)                                                                                                                            | na                |
| <b>Discussion:</b>                           |     |                                                                                                                                                                                                                                                                   |                   |
| Limitations†                                 | 20  | Trial limitations, addressing sources of potential bias, imprecision, and if relevant, multiplicity of analyses. Consider potential carry over effects                                                                                                            | 10-11             |
| Generalisability‡                            | 21  | Generalisability (external validity, applicability) of the trial findings                                                                                                                                                                                         | 11                |
| Interpretation‡                              | 22  | Interpretation consistent with results, balancing benefits and harms, and considering other relevant evidence                                                                                                                                                     | 10-11             |
| <b>Other information:</b>                    |     |                                                                                                                                                                                                                                                                   |                   |



|               |    |                                                                                 |    |
|---------------|----|---------------------------------------------------------------------------------|----|
| Registration‡ | 23 | Registration number and name of trial registry                                  | 17 |
| Protocol‡     | 24 | Where the full trial protocol can be accessed, if available                     | na |
| Funding‡      | 25 | Sources of funding and other support (such as supply of drugs), role of funders | 12 |

CONSORT=Consolidated Standards of Reporting Trials.

\*Note: page numbers are optional depending on journal requirements.

†Modified original CONSORT item.

‡Unmodified CONSORT item.

§Random sequence here refers to a list of random orders, typically generated through a computer program. This should not be confused with the sequence of interventions in a randomised crossover trial, for example receiving intervention A before B for an individual trial participant.

¶A within participant comparison takes into account the correlation between measurements for each participant because they act as their own control, therefore measurements are not independent.

¥ Ioannidis JP, Evans SJ, Gotzsche PC, et al. CONSORT Group. Better reporting of harms in randomized trials: an extension of the CONSORT statement. *Ann Intern Med* 2004;141:781-8.

doi:10.7326/0003-4819-141-10-200411160-00009
